# Supplementary material for: Genome wide expression profiling of p53 regulated miRNAs in neuroblastoma
Source: PubMed Central journal article supplement (PMC4356961; doi:10.1038/srep09027), 2015-03-12
Supplement: srep09027-s1.pdf [file srep09027-s1.pdf]

# **Genome wide expression profiling of p53 regulated miRNAs in neuroblastoma**

Ali Rihani<sup>1</sup>, Alan Van Goethem<sup>1</sup>, Maté Ongenaert<sup>1</sup>, Sara De Brouwer<sup>1</sup>, Pieter-Jan Volders<sup>1</sup>, Saurabh Agarwal<sup>2</sup>, Katleen De Preter<sup>1</sup>, Pieter Mestdagh<sup>1</sup>, Jason Shohet<sup>2</sup>, Frank Speleman<sup>1</sup>, Jo Vandesompele<sup>1</sup>, and Tom Van Maerken<sup>1,§</sup>

<sup>1</sup>Center for Medical Genetics, Ghent University, De Pintelaan 185, B-9000 Ghent,  
Belgium

<sup>2</sup>Texas Children's Cancer Center, Baylor College of Medicine, Houston, Texas

<sup>§</sup>Corresponding author

Figure S1

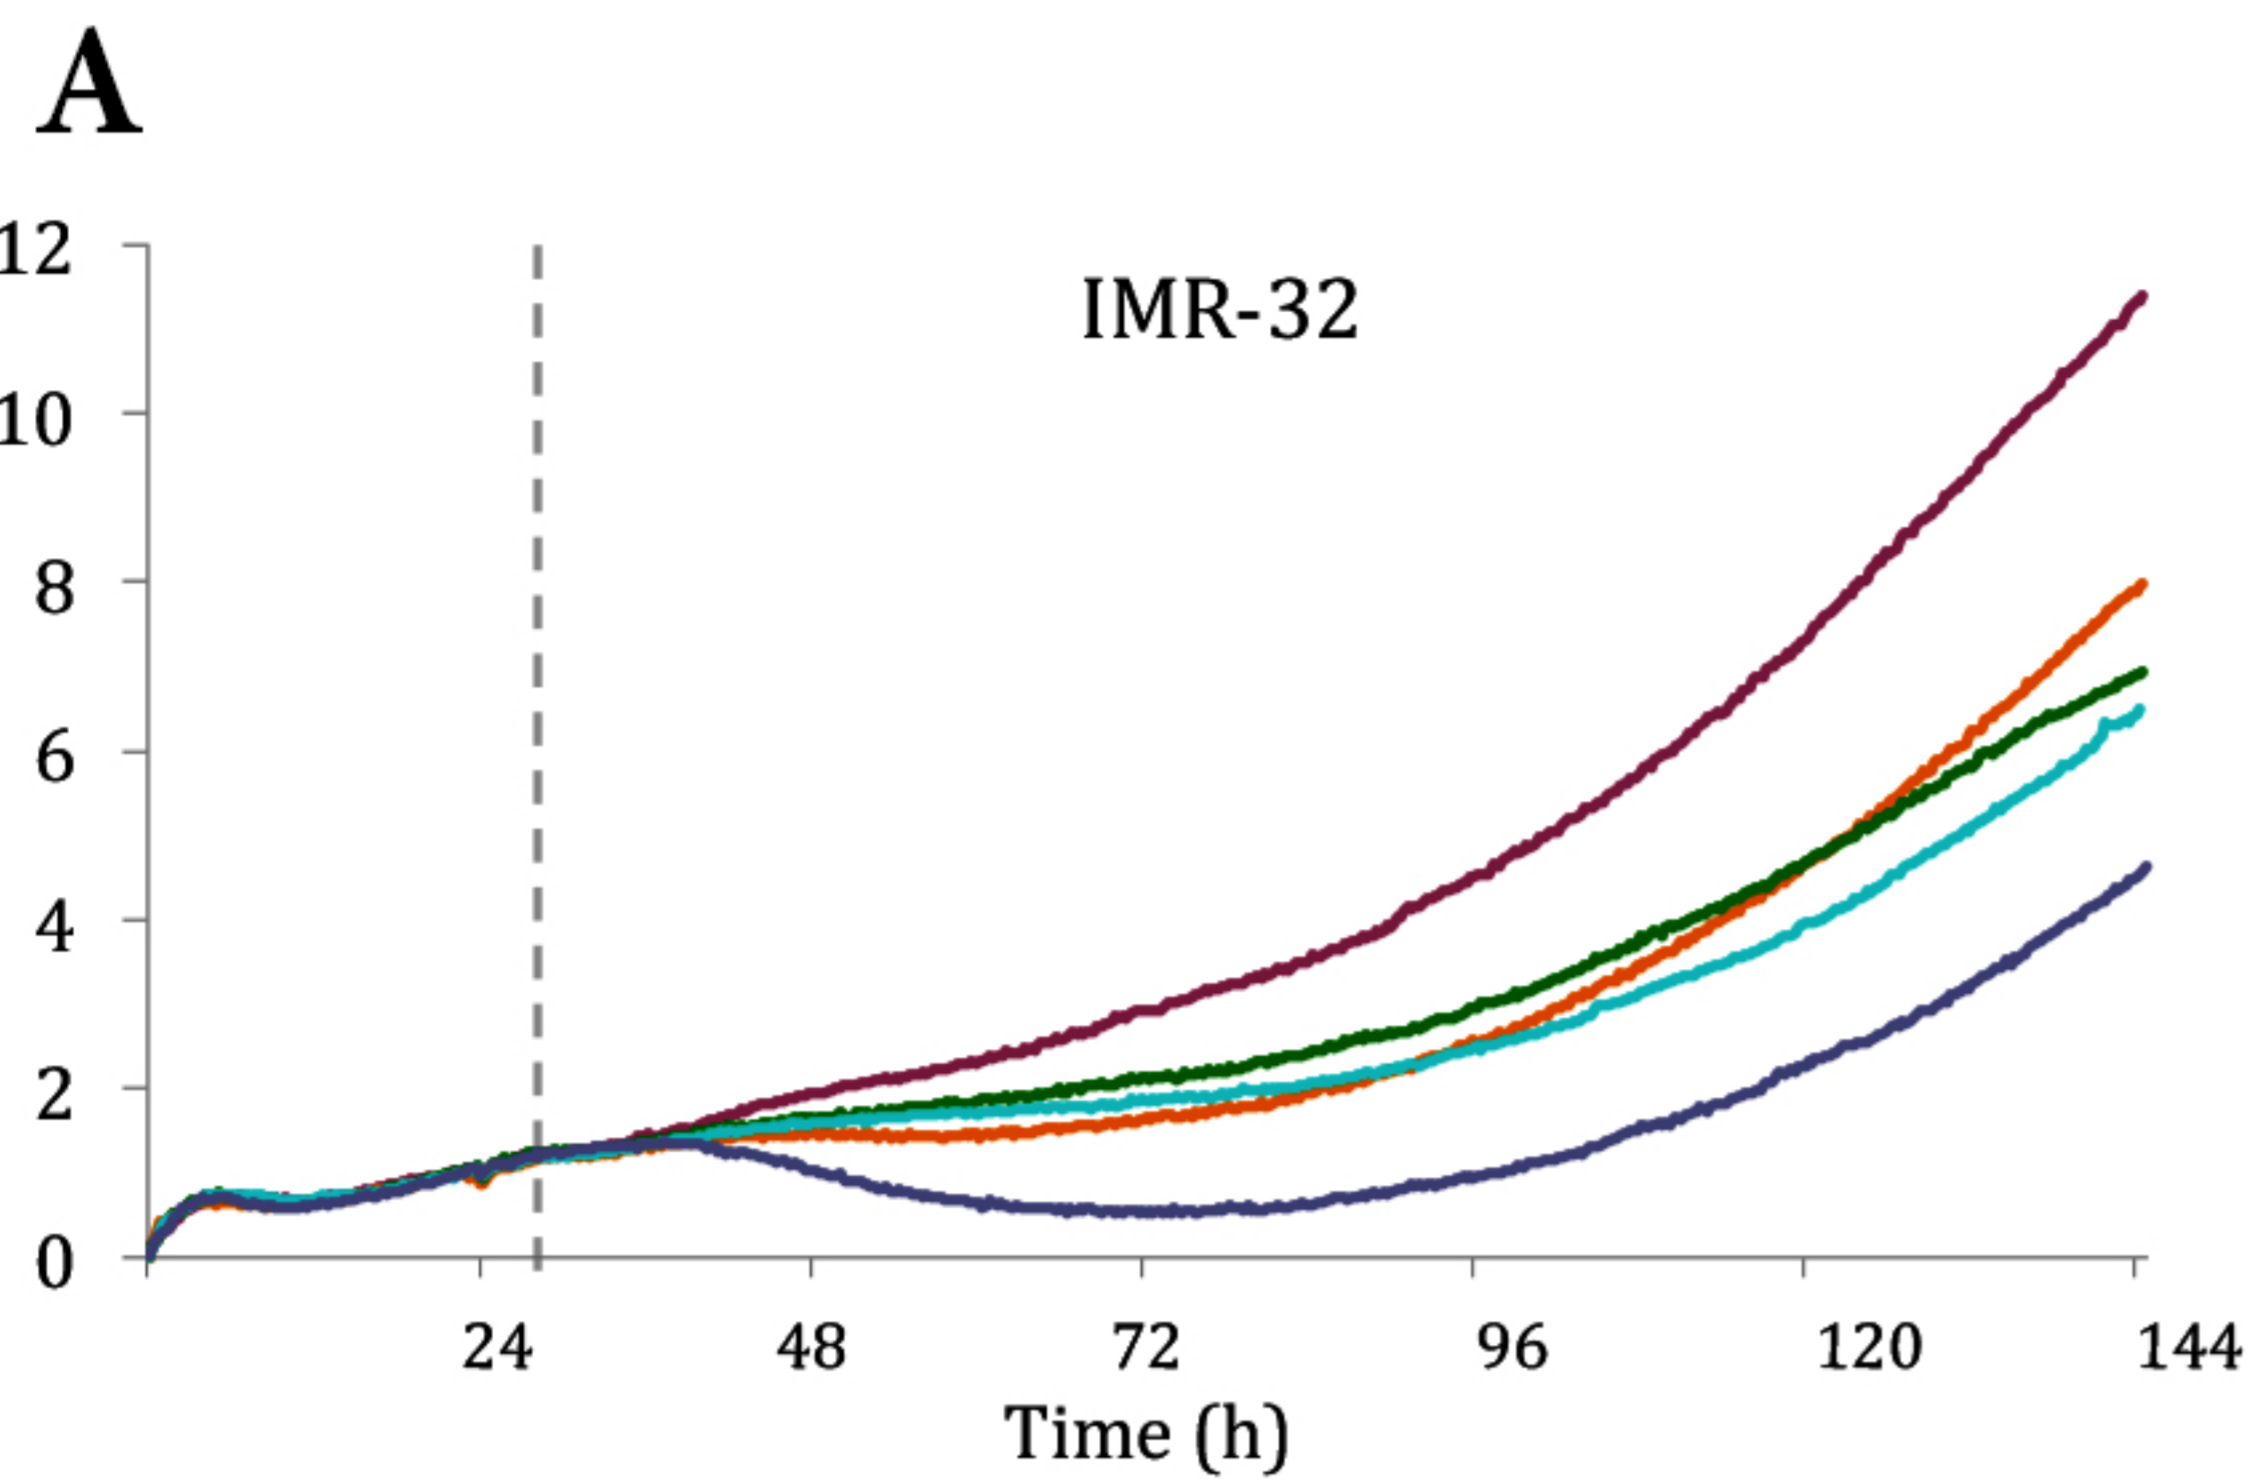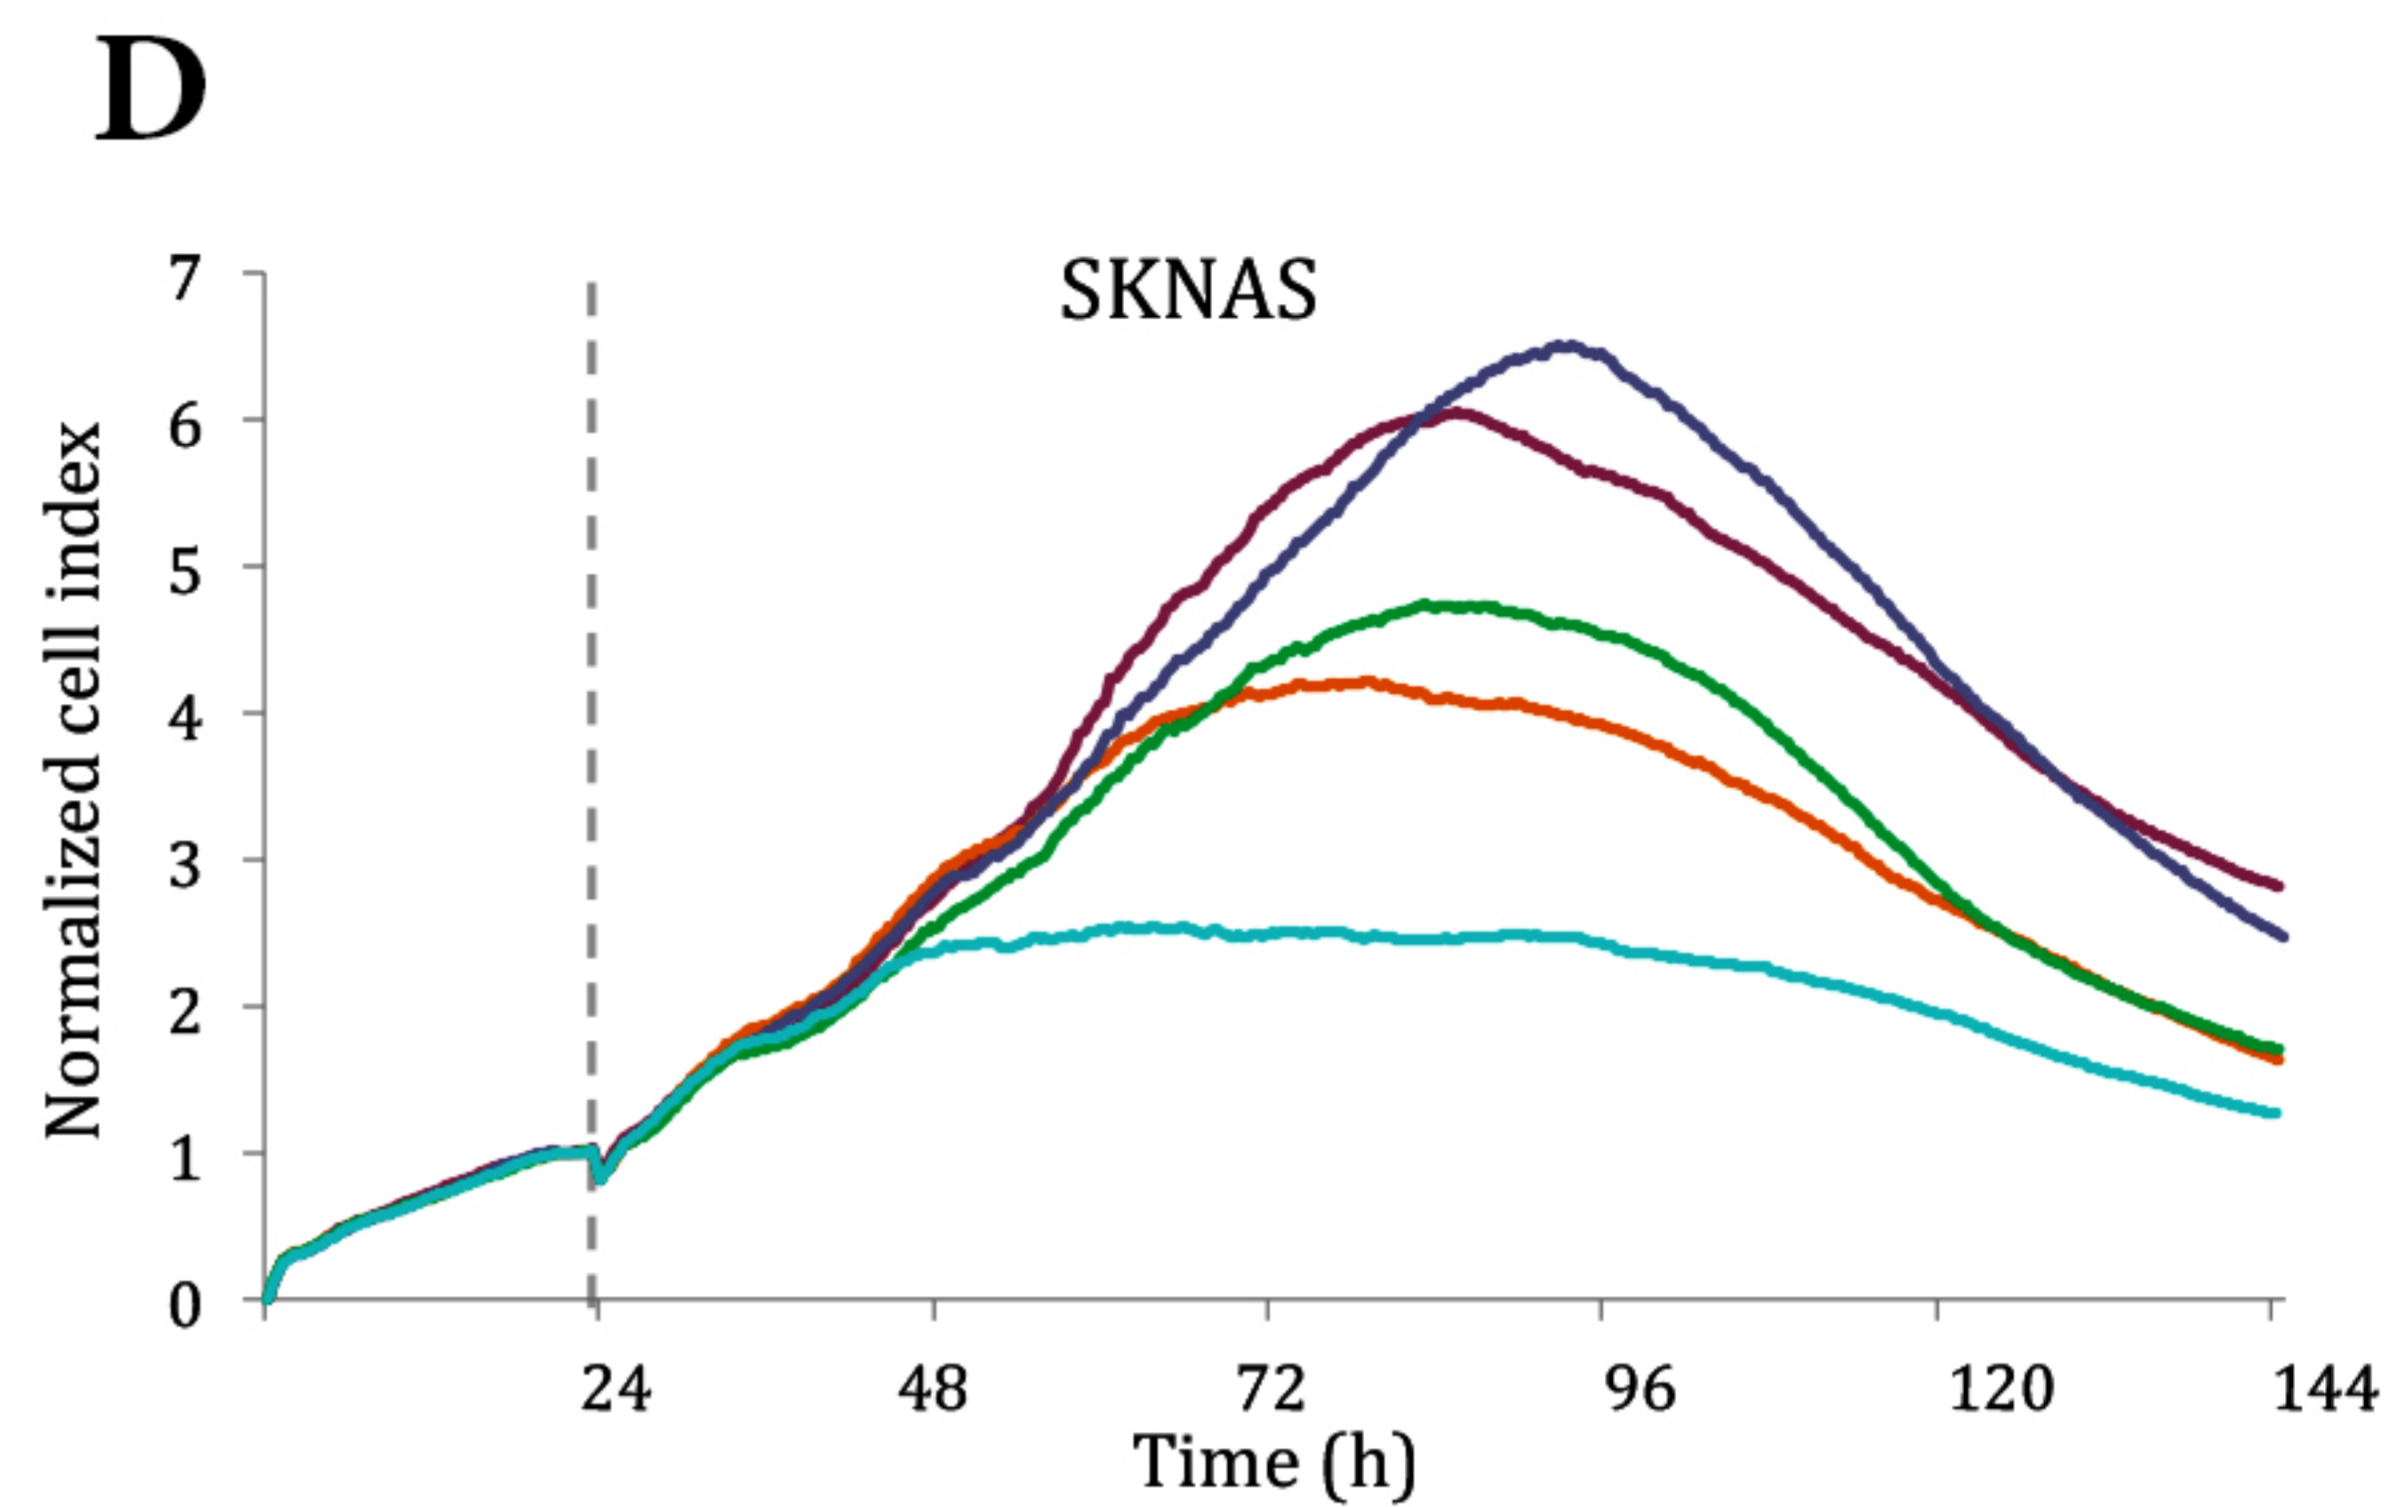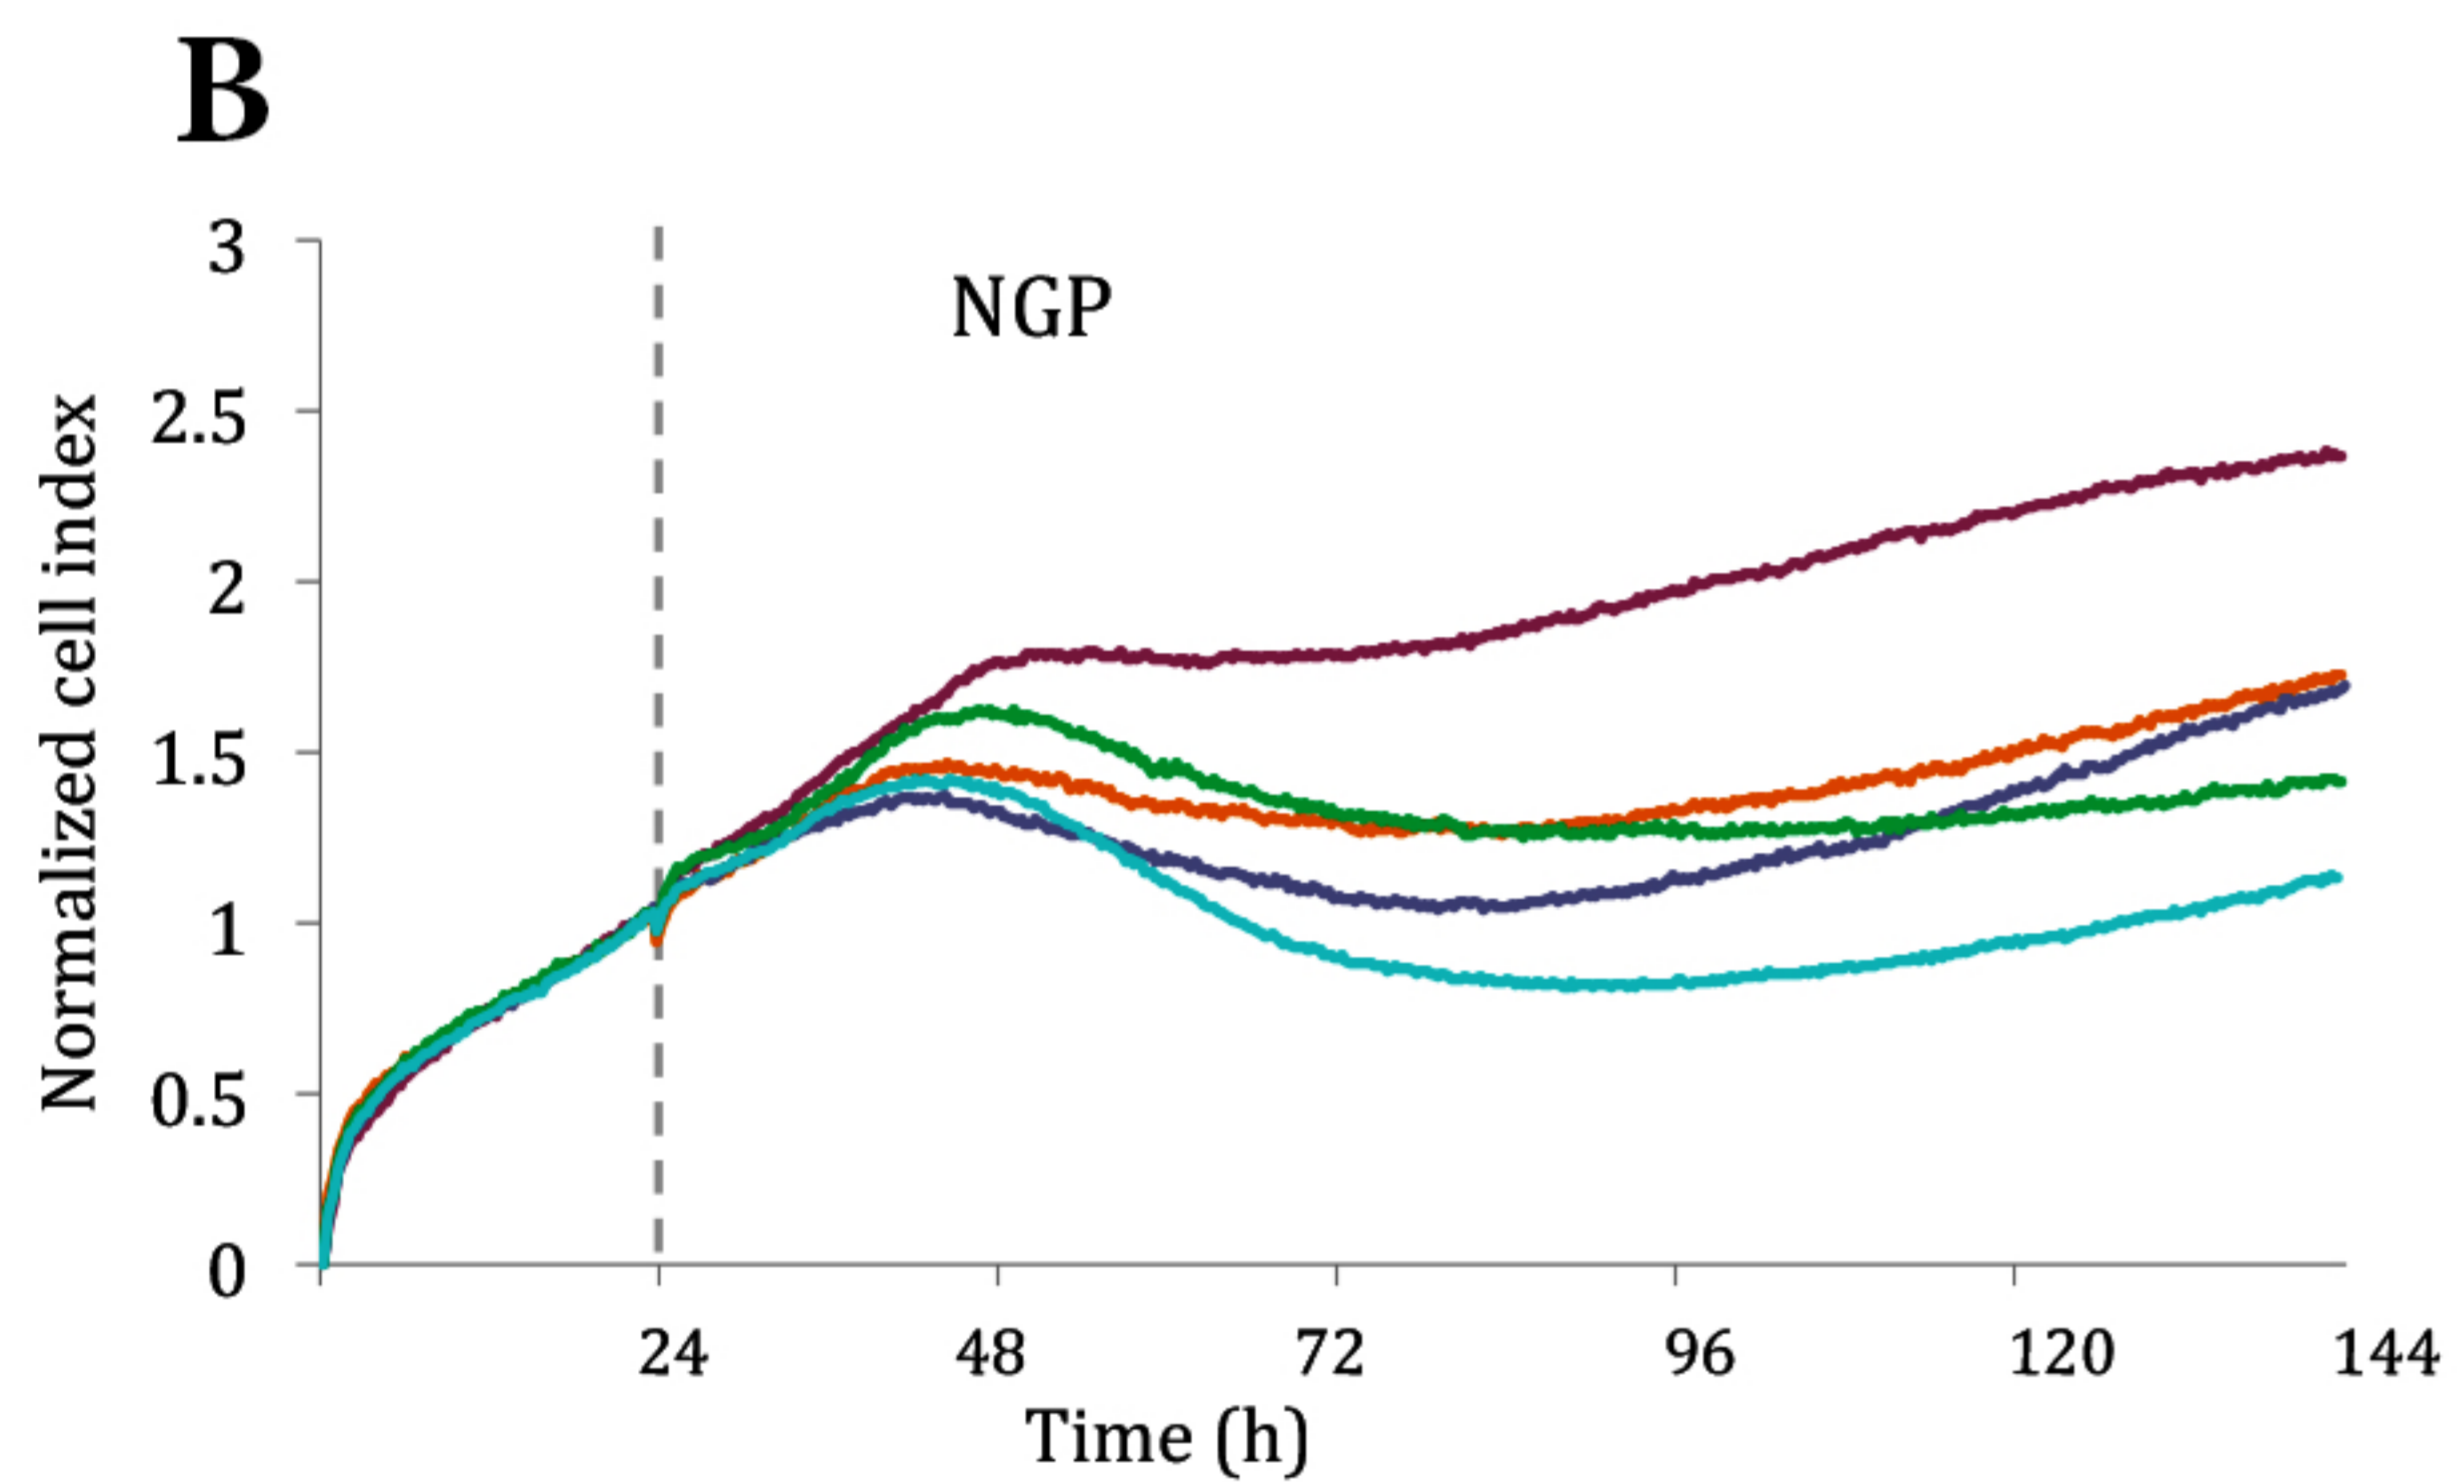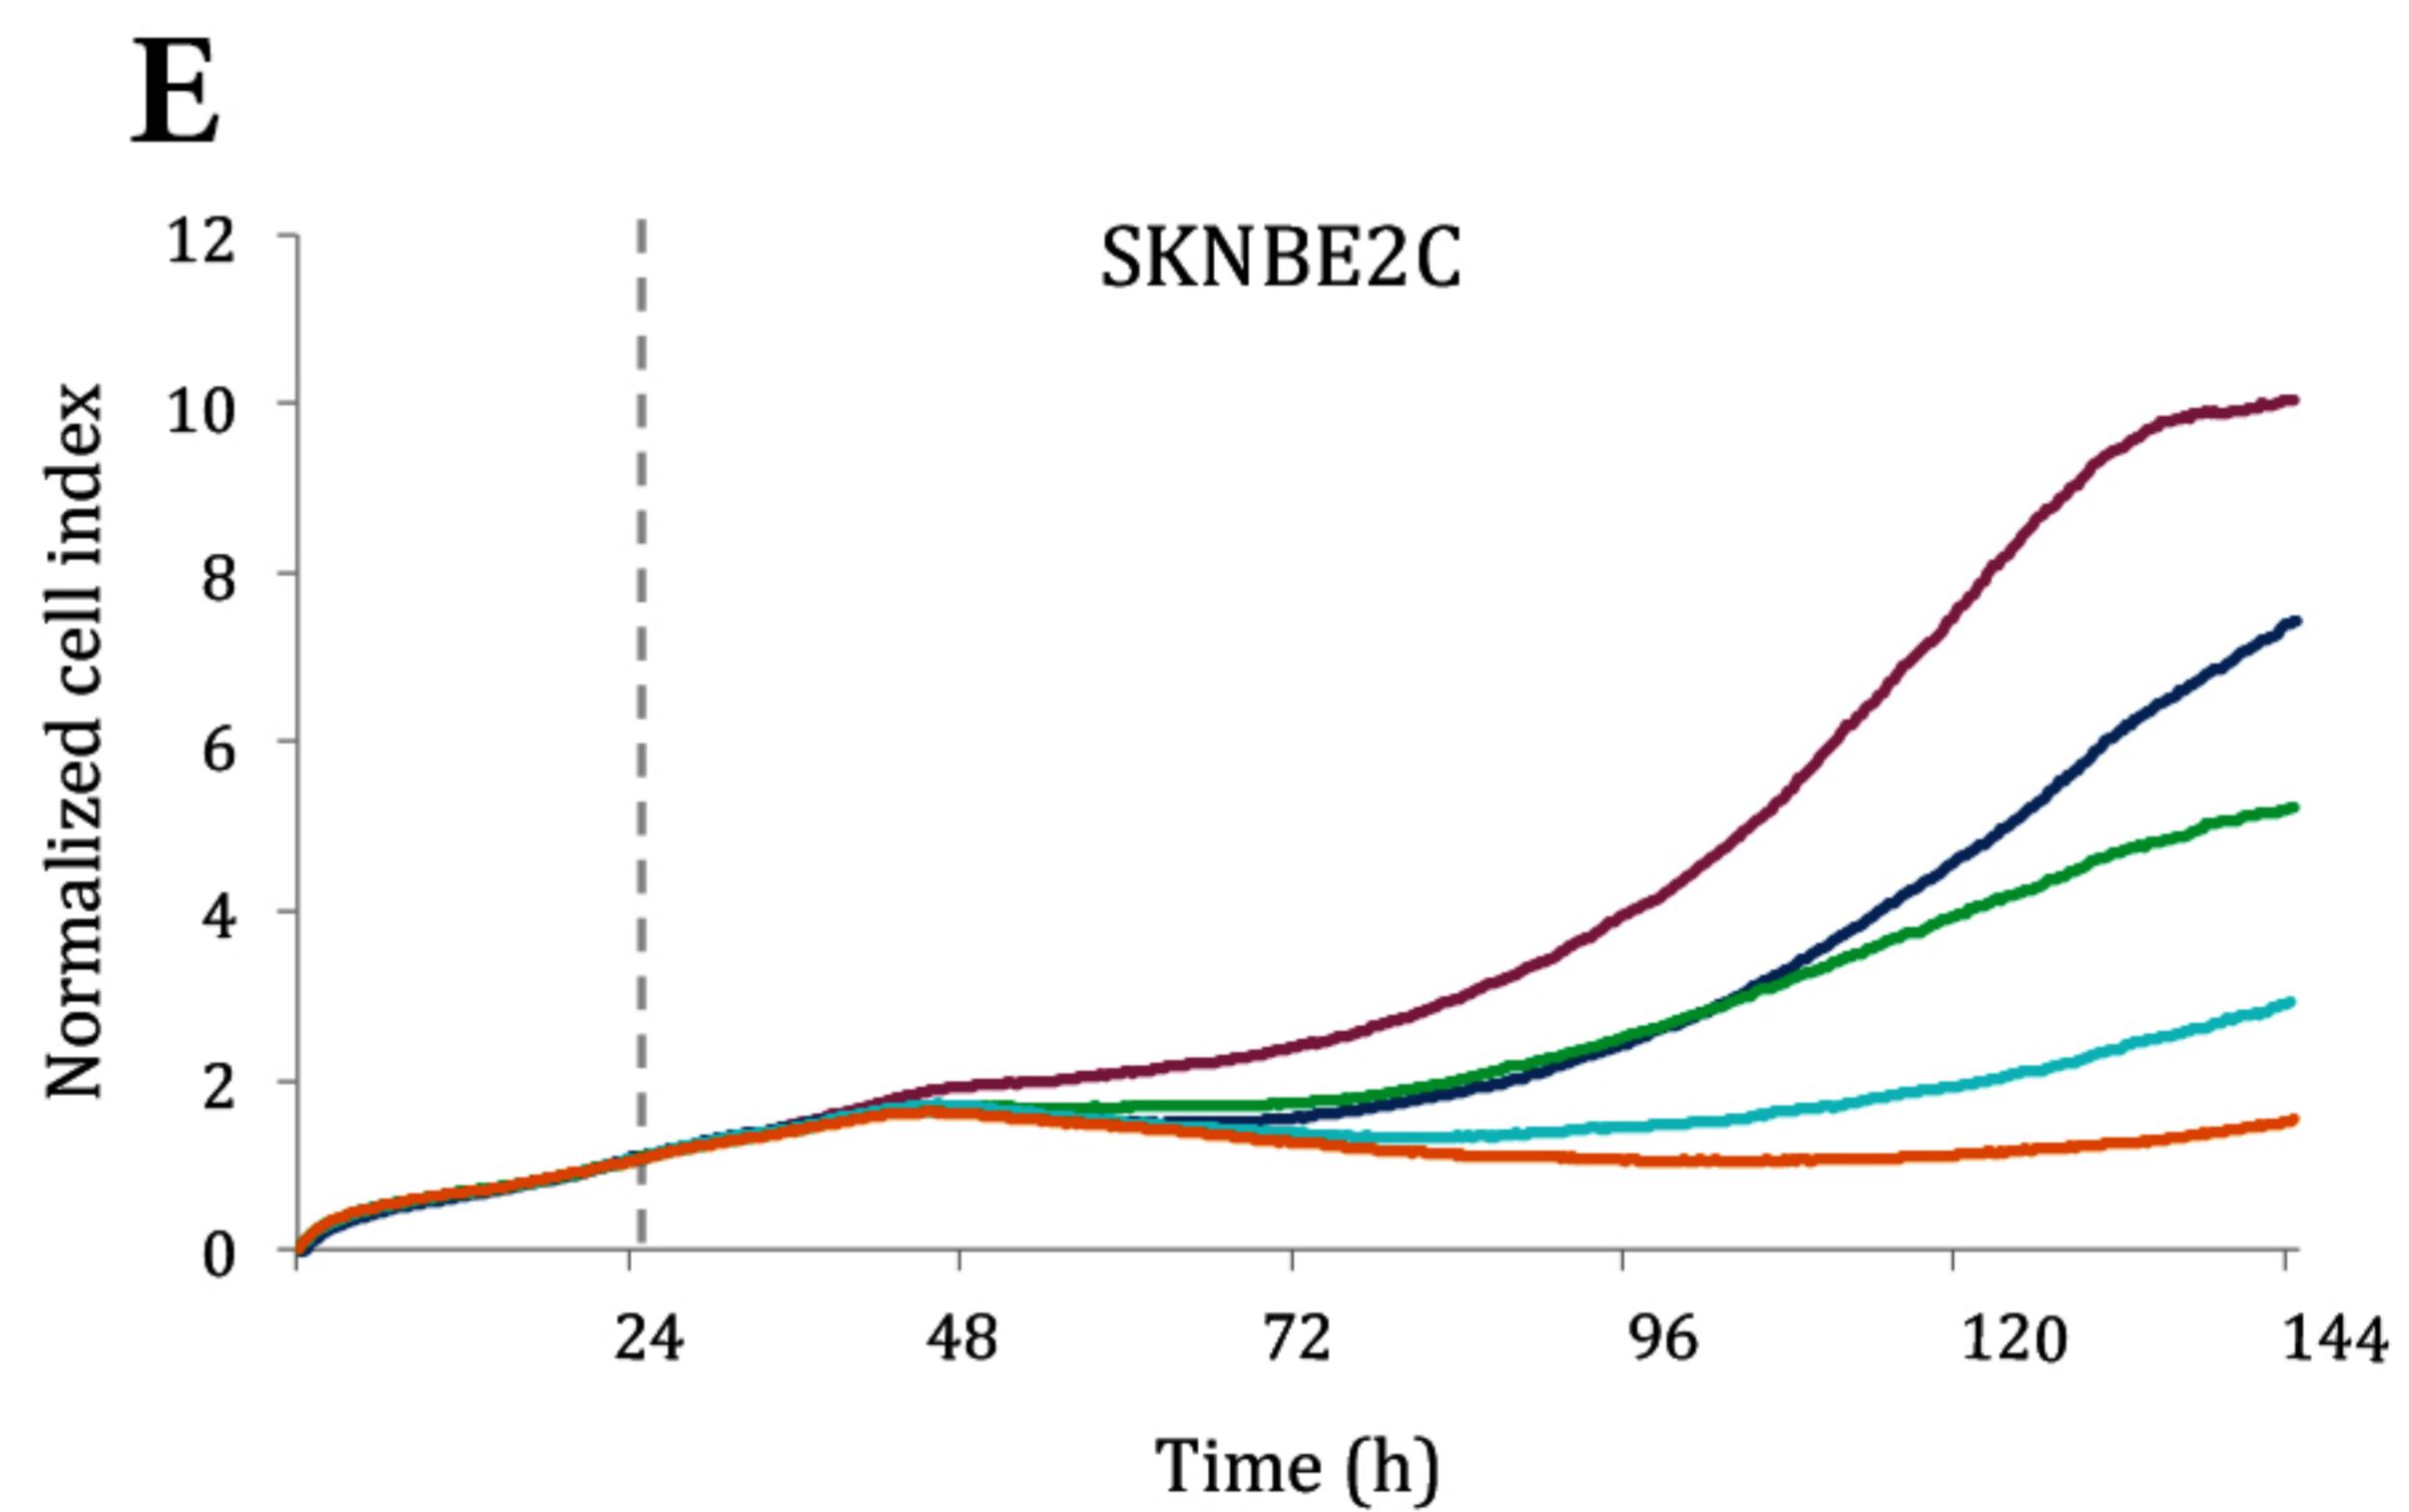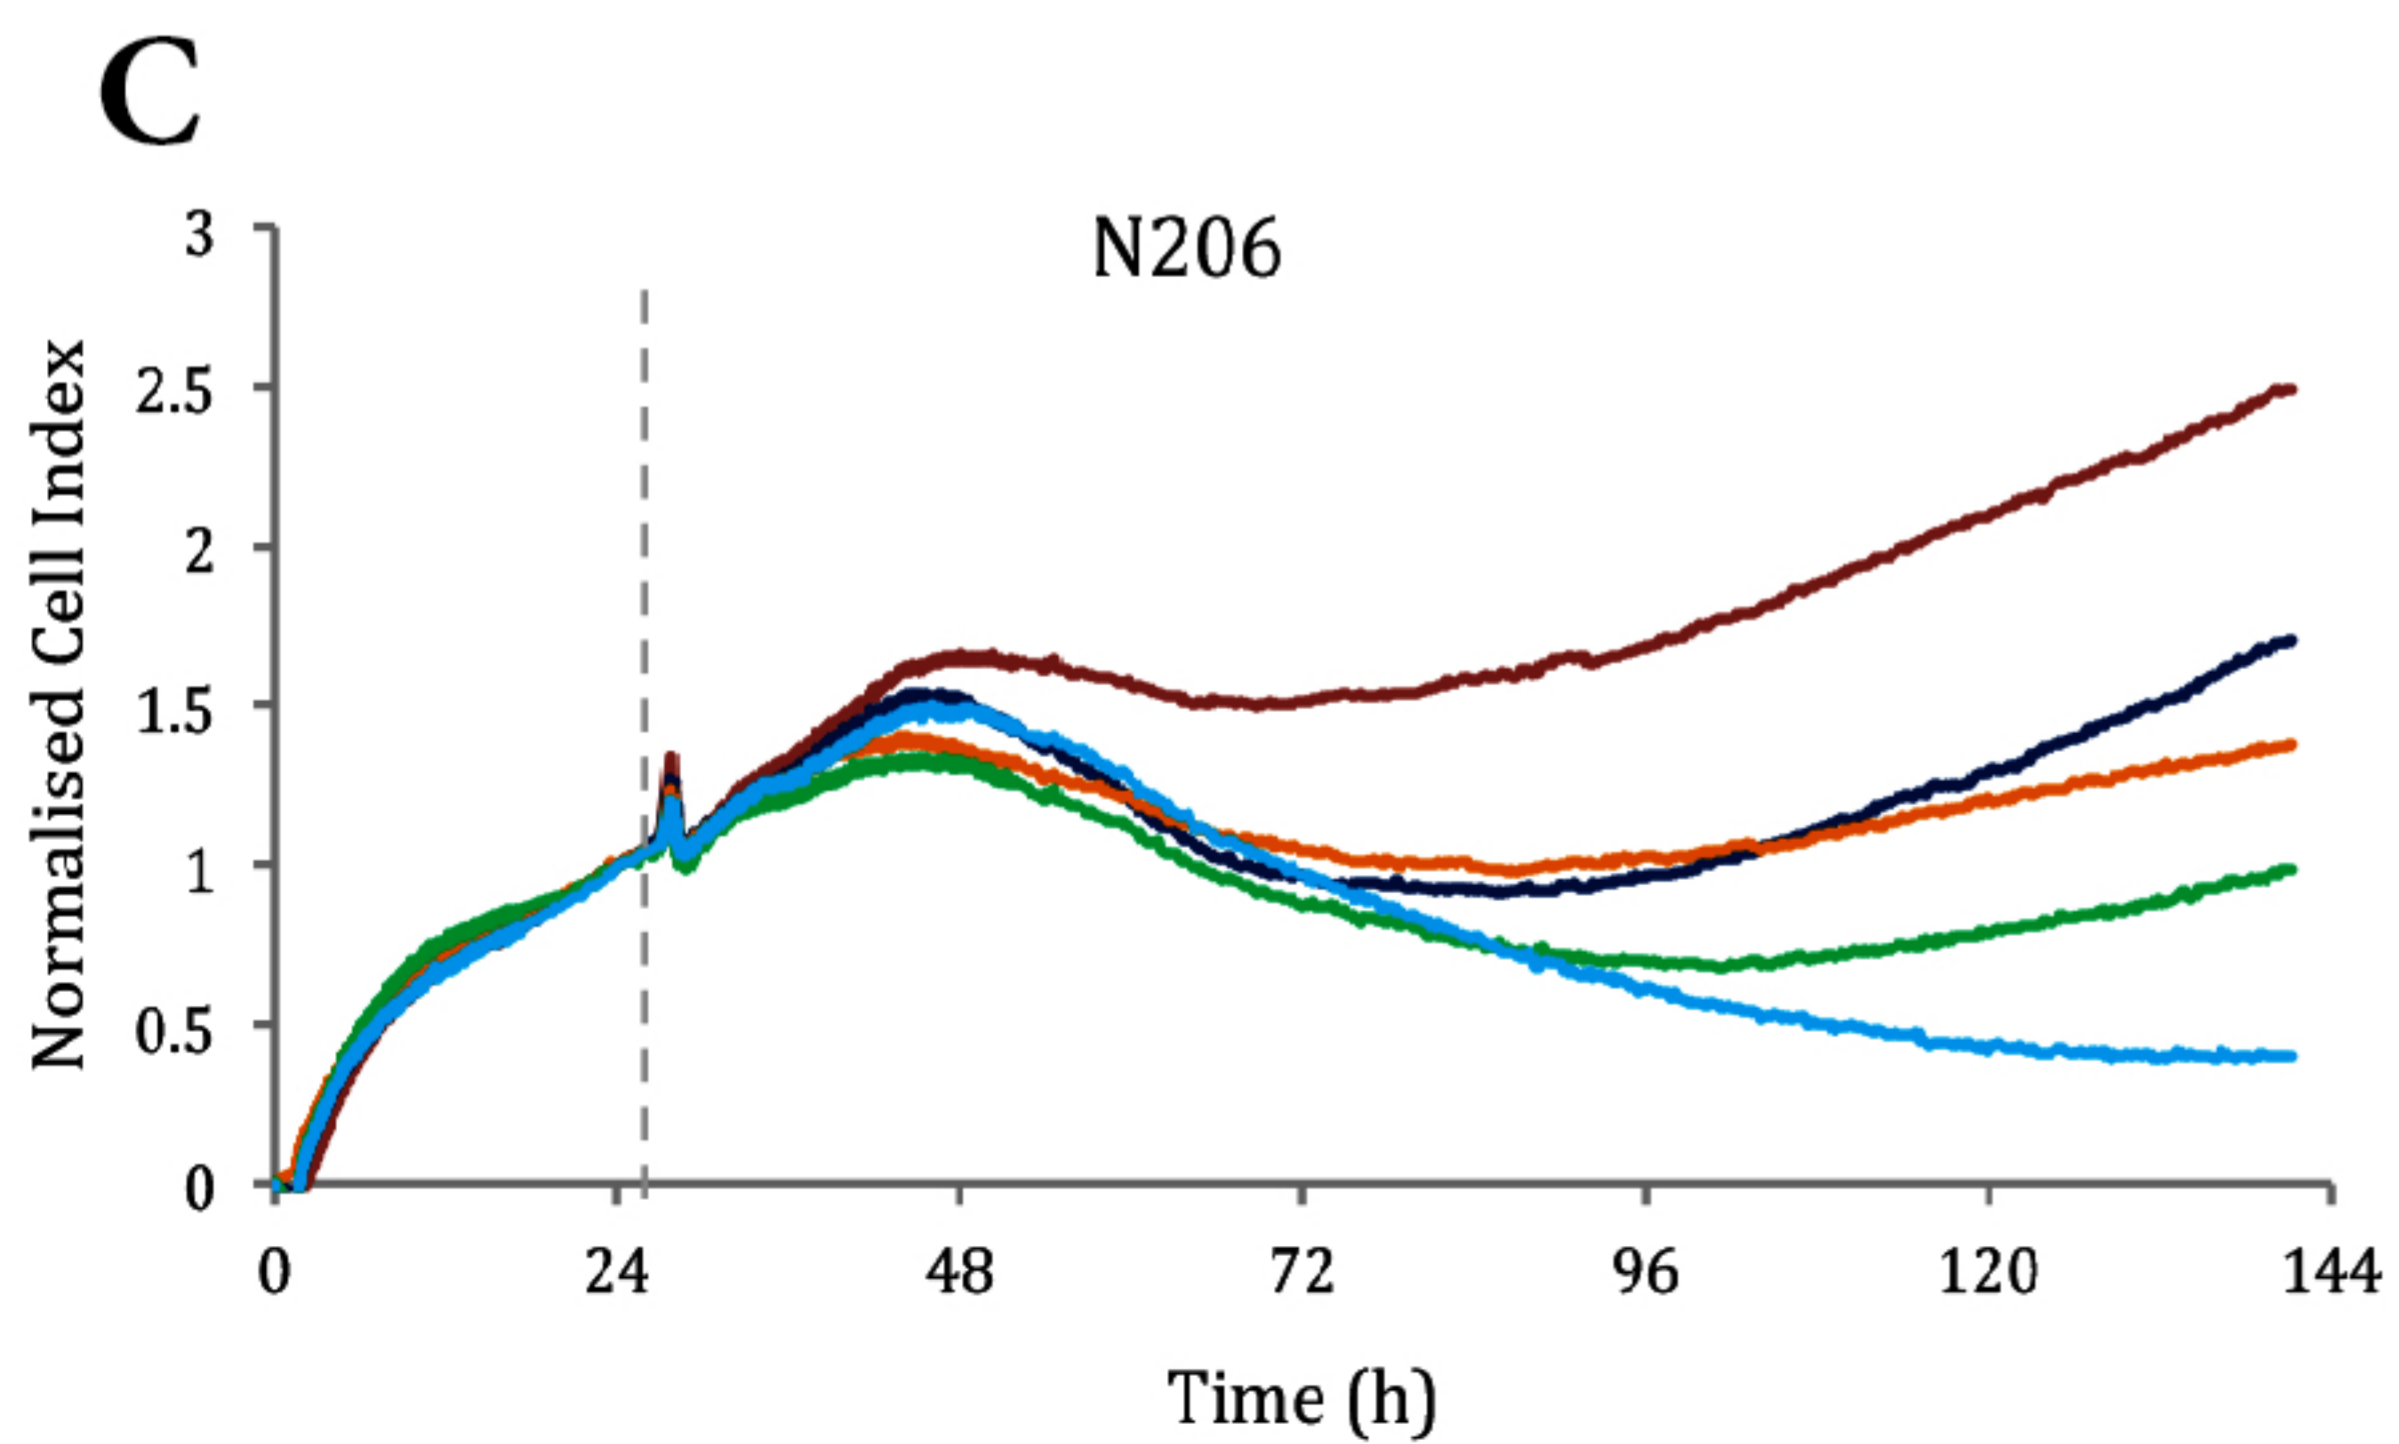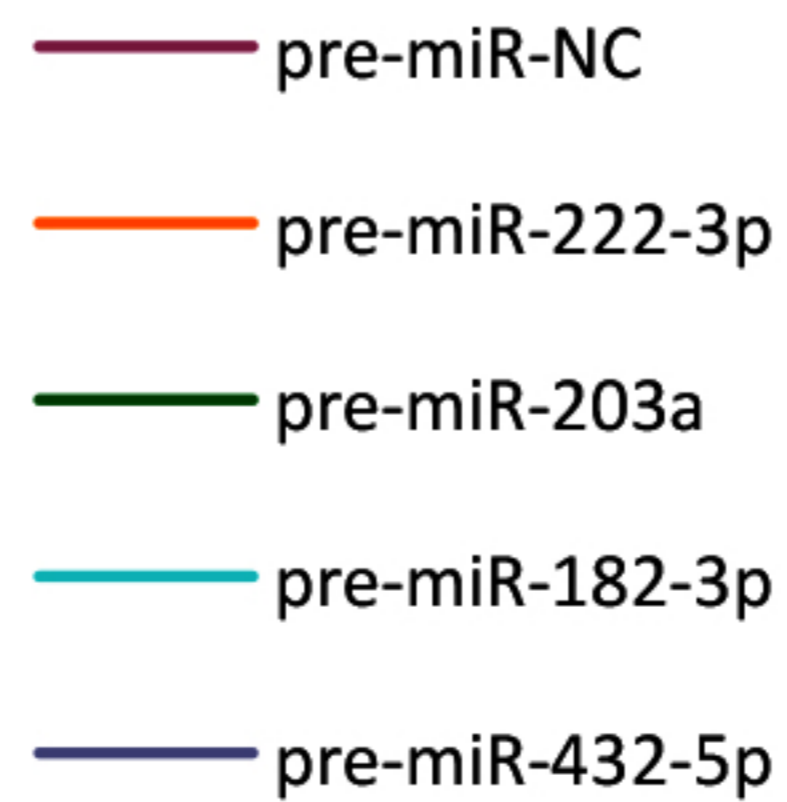

Figure S2

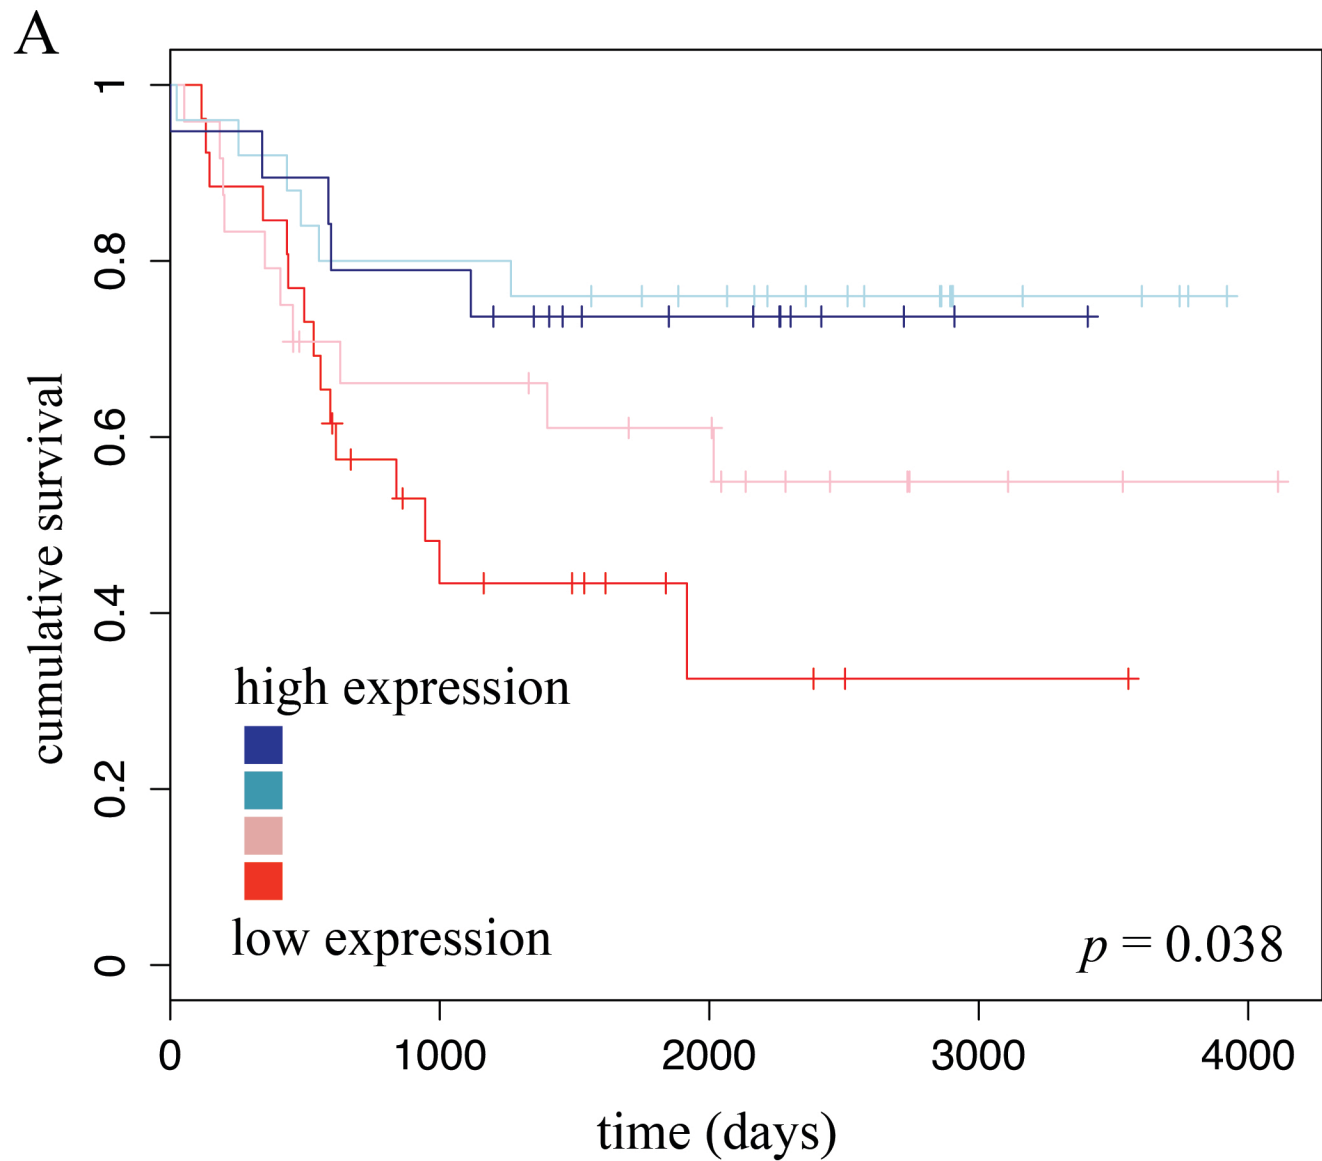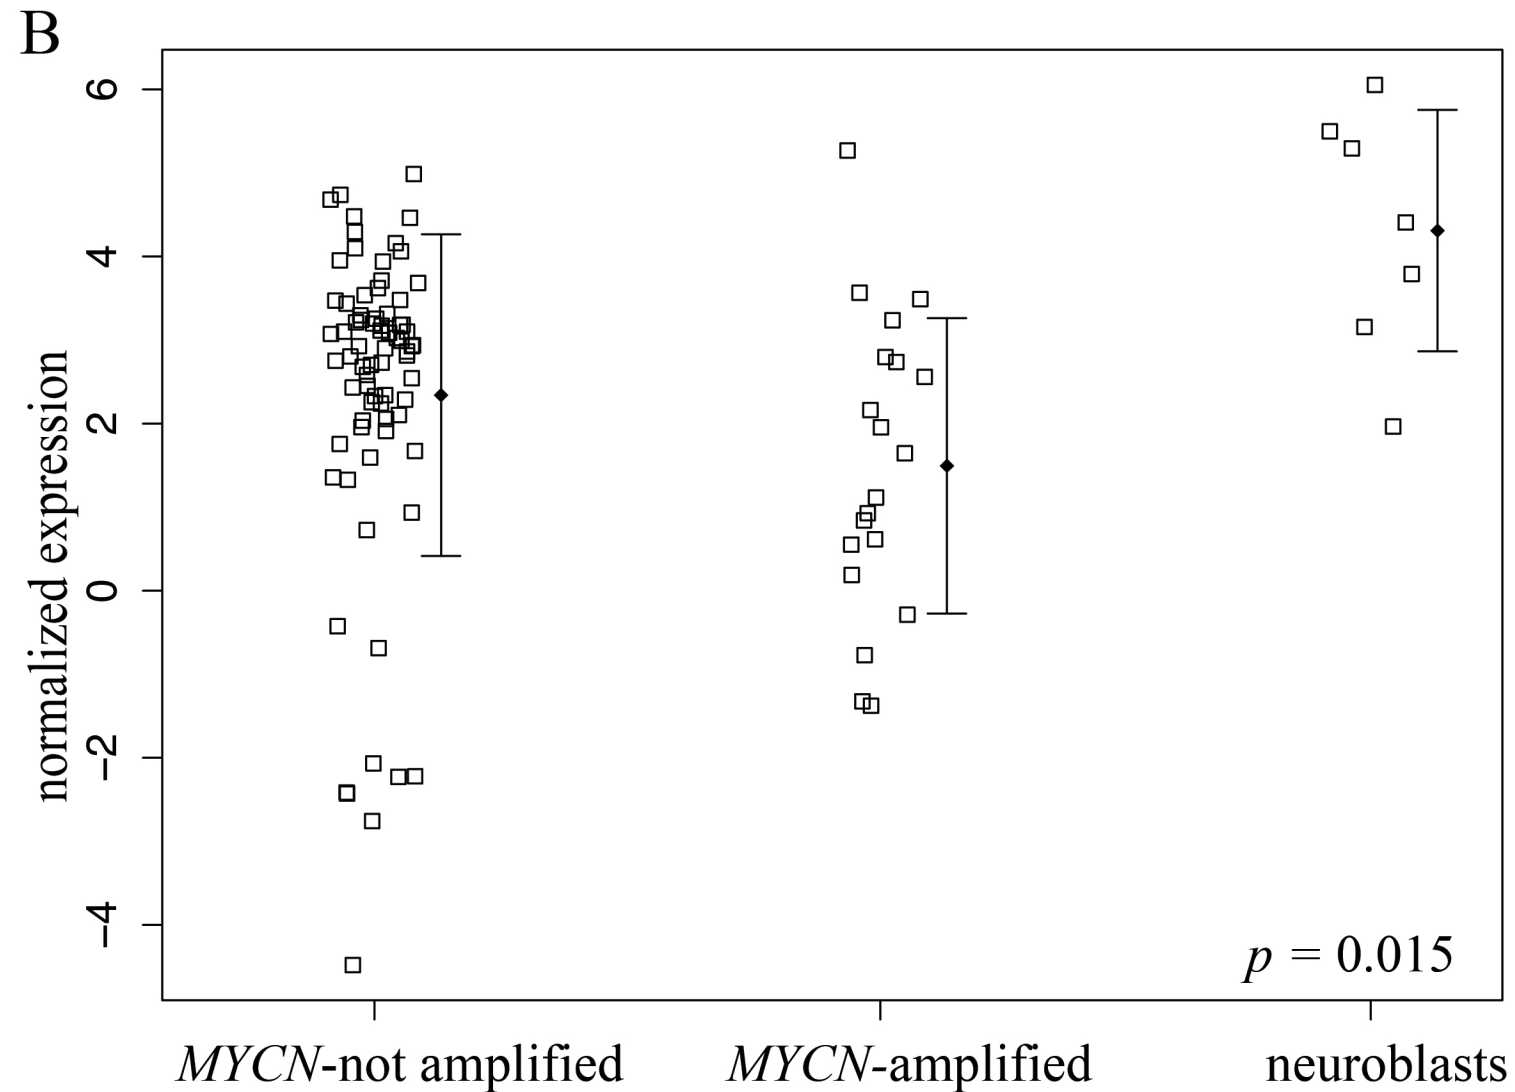

Figure S1: **Overexpression of miRNAs reduces proliferation.** Neuroblastoma cell lines were transfected with the indicated pre-miRs, and their growth was assessed using the xCELLigence system. Transfection time point is used for normalization (dotted line). IMR-32(**A**), NGP (**B**), N206 (**C**), SKNAS (**D**), SKNBE(2c) (**E**).

Figure S2: **Survival and expression analysis of miR-432-5p.** Kaplan-Meier progression-free survival curve for neuroblastoma patients (n=100) stratified according to miR-432-5p expression levels (quartiles) (log-rank test p-value) (**A**). Comparison of miR-432-5p expression between neuroblasts and primary neuroblastoma tumors stratified according to MYCN status, data compared using rank product analysis. MNN (*MYCN* non-amplified neuroblastoma), MNA (*MYCN* amplified neuroblastoma) (**B**).

**miR-432-5p expression is associated with progression free survival of neuroblastoma patients and is expressed higher in normal fetal neuroblasts**

We analyzed the expression patterns of the aforementioned miRNAs in a cohort of 100 primary neuroblastoma tumors and human fetal adrenal neuroblasts (details in materials and methods), the latter being the cell of origin for neuroblastoma [7,12]. While the miRNAs were not significantly associated to overall survival, low expression of miR-432-5p was significantly associated with poor progression-free survival and shows lower expression in the *MYCN*-amplified neuroblastoma tumors as compared to the tumors without *MYCN* amplification. When comparing the expression of the 4 miRNAs between the neuroblastoma tumors and the neuroblasts, miR-432-5p and miR-203a show higher expression in the neuroblasts as compared to the neuroblastoma tumors (Figure 4).
